# Supplementary material for: Free-standing Li+-conductive films based on PEO–PVDF blends
Source: Royal Society of Chemistry journal article supplement (doi:10.1039/d0ra02325f), 2020-01-01
Supplement: d0ra02325f1.pdf [file d0ra02325f1.pdf]

## Free-standing Li<sup>+</sup>-conductive films based on PEO-PVDF blends

### Supplementary materials

Elena E. Ushakova,<sup>1,2,4</sup> Artem V. Sergeev,<sup>1</sup> Artem Morzhukhin,<sup>3</sup> Filipp S. Napolskiy,<sup>3</sup> Olga Kristavchuk,<sup>4</sup> Alexander V. Chertovich<sup>1,2</sup>, Lada V. Yashina,<sup>1,2</sup> and Daniil M. Itkis<sup>1,2\*</sup>

<sup>1</sup> N.N.Semenov Federal Research Center for Chemical Physics

<sup>2</sup> Lomonosov Moscow State University

<sup>3</sup> Dubna University

<sup>4</sup> Joint Institute for Nuclear Research

\* Corresponding author: [d.itkis@chph.ras.ru](mailto:d.itkis@chph.ras.ru)

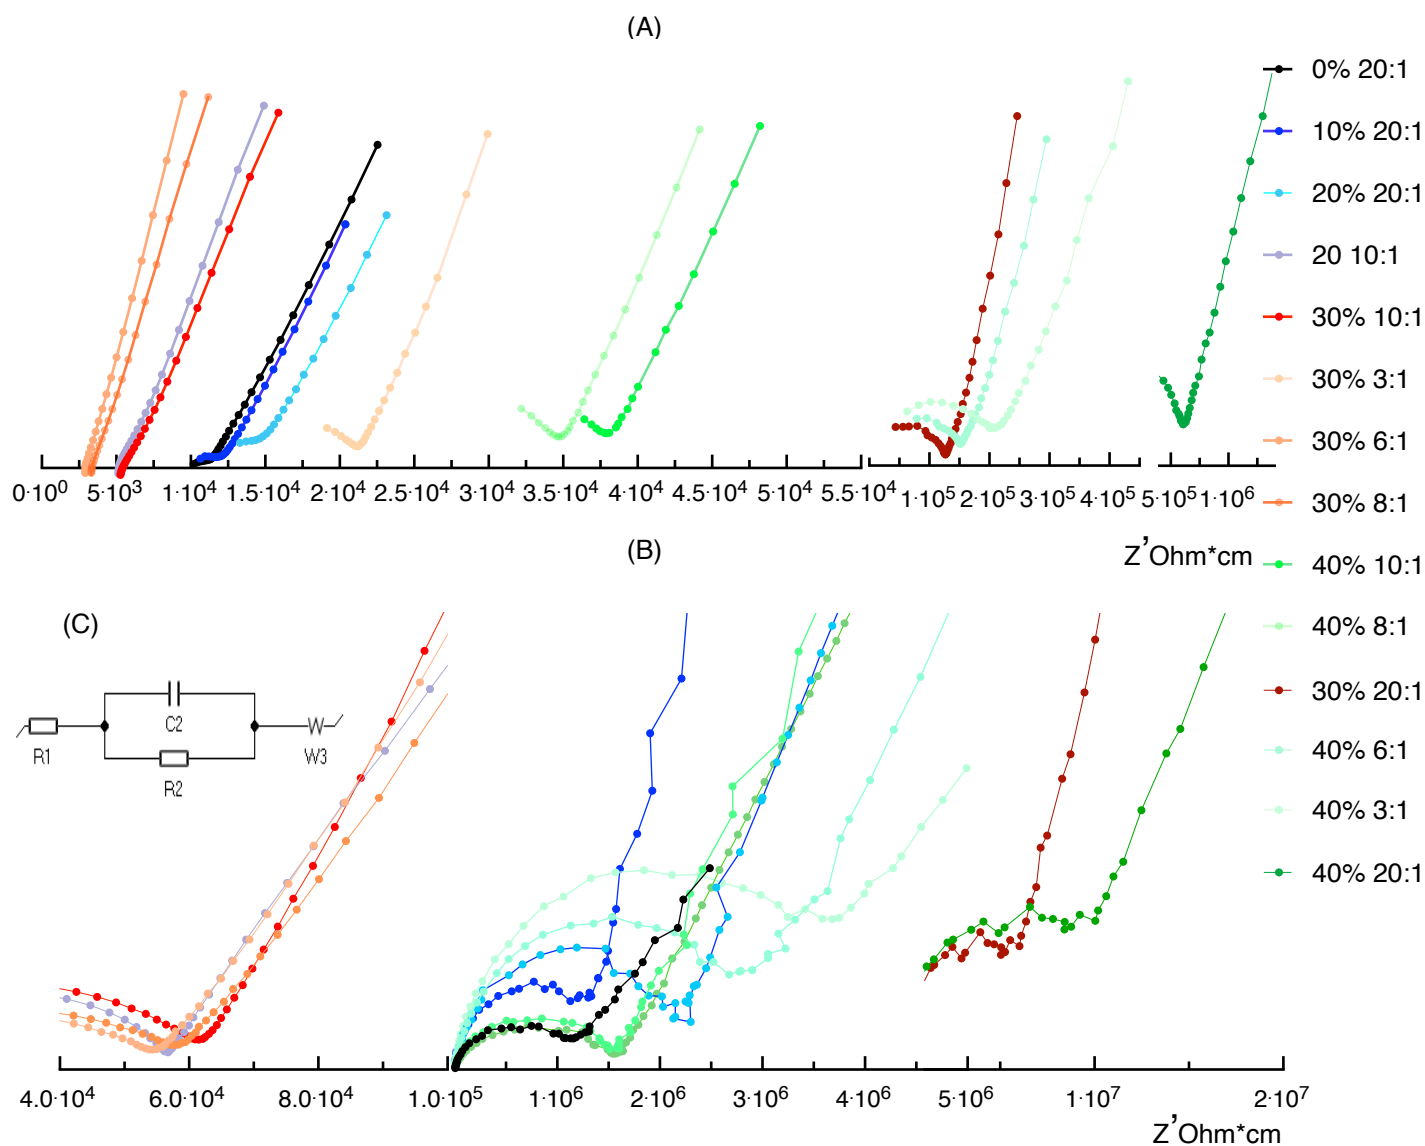

**Figure S1.** Nyquist plots of electrochemical impedance spectroscopy (EIS) for determining ionic conductivity of PEO-PVDF based polymer films at **(A)** 60 and **(B)** 25°C. The measurements were performed in two-electrode symmetric cell with stainless steel electrodes ( $S_{\text{electrode}} = 1.77 \text{ cm}^2$ ). **(C)** The equivalent circuit for calculating film resistance. R1, R2 are the contact and bulk film resistance, respectively, C2 is a film capacity, W3 is a Warburg element.

**Table S1.** Calculated ionic conductivity ( $\sigma$ , S/cm) and specific resistance ( $1/\sigma$ ,  $\text{Ohm}\cdot\text{cm}$ ) of PEO-PVDF based polymer films at **(A)** 60 and **(B)** 25°C.

|     |  | Conductivity, S/cm                                              |          |          |          |          |
|-----|--|-----------------------------------------------------------------|----------|----------|----------|----------|
| 60C |  | 40%                                                             | 30%      | 20%      | 10%      | 0%       |
| 20  |  | 1.66E-06                                                        | 7.98E-06 | 6.93E-05 | 8.09E-05 | 8.78E-05 |
| 10  |  | 2.64E-05                                                        | 1.84E-04 | 1.94E-04 |          |          |
| 8   |  | 2.88E-05                                                        | 2.98E-04 |          |          |          |
| 6   |  | 6.66E-06                                                        | 3.45E-04 |          |          |          |
| 3   |  | 4.93E-06                                                        | 4.77E-05 |          |          |          |
| 60C |  | Specific resistance (1/conductivity) $\text{Ohm}\cdot\text{cm}$ |          |          |          |          |
| 20  |  | 6.01E+05                                                        | 1.25E+05 | 1.44E+04 | 1.24E+04 | 1.14E+04 |
| 10  |  | 3.79E+04                                                        | 5.45E+03 | 5.16E+03 |          |          |
| 8   |  | 3.48E+04                                                        | 3.36E+03 |          |          |          |
| 6   |  | 1.50E+05                                                        | 2.90E+03 |          |          |          |
| 3   |  | 2.03E+05                                                        | 2.10E+04 |          |          |          |

|     |  | Conductivity, S/cm                                              |          |          |          |          |
|-----|--|-----------------------------------------------------------------|----------|----------|----------|----------|
| 25C |  | 40%                                                             | 30%      | 20%      | 10%      | 0%       |
| 20  |  | 1.14E-07                                                        | 1.91E-07 | 4.60E-07 | 8.24E-07 | 8.65E-07 |
| 10  |  | 6.44E-07                                                        | 1.65E-05 | 1.77E-05 |          |          |
| 8   |  | 6.60E-07                                                        | 1.76E-05 |          |          |          |
| 6   |  | 3.83E-07                                                        | 1.86E-05 |          |          |          |
| 3   |  | 2.85E-07                                                        | 1.84E-06 |          |          |          |
| 25C |  | Specific resistance (1/conductivity) $\text{Ohm}\cdot\text{cm}$ |          |          |          |          |
|     |  | 8.74E+06                                                        | 5.24E+06 | 2.17E+06 | 1.21E+06 | 1.16E+06 |
|     |  | 1.55E+06                                                        | 60761.09 | 56619.82 |          |          |
|     |  | 1.52E+06                                                        | 56976.81 |          |          |          |
|     |  | 2.61E+06                                                        | 53636.27 |          |          |          |
|     |  | 3.50E+06                                                        | 544614.8 |          |          |          |

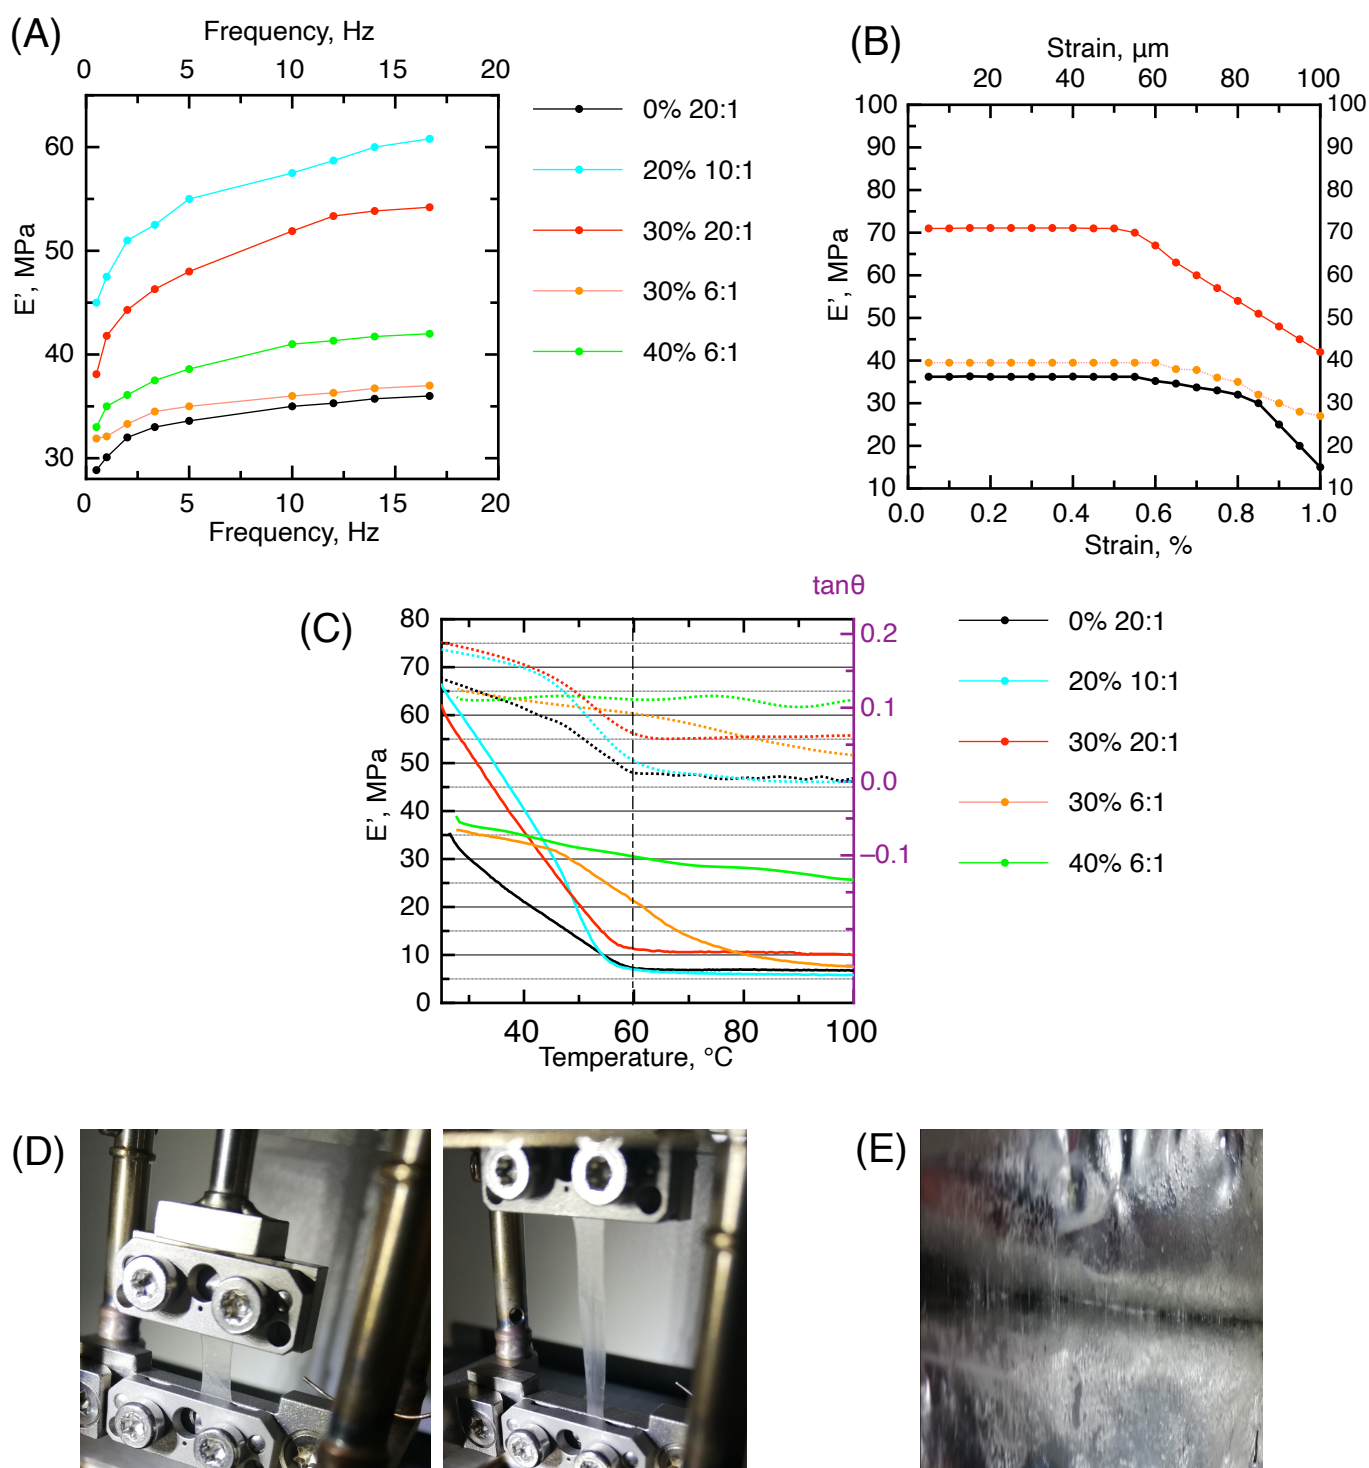

**Figure S2.** Dynamic mechanical analysis and the photographs of the films. **(A)** Dependence of the storage modulus  $E'$  on frequency for PEO<sub>x</sub>LiTFSI\*m%PVDF SPEs. **Testing parameters:** Stretching amplitude  $A=0.3\%$  (30  $\mu\text{m}$ ), frequency range - from 0.05 to 16Hz,  $T=25^\circ\text{C}$ . **(B)** Strain-stress diagram recorded with a step dynamic load for defining range of  $E'$  linear response. The amplitude was increased by 5  $\mu\text{m}$  at each step. Loading frequency  $f = 10$  Hz, temperature  $25^\circ\text{C}$ . Sample size: 10.5mm x 4mm x 0.1mm. **(C)** The temperature dependence of the storage modulus  $E'$  (solid line) and  $\tan\theta$  (dotted line) for PEO<sub>x</sub>LiTFSI\*m%PVDF SPEs. **Testing parameters:** amplitude  $A = 0.3\%$ , frequency  $f = 10$  Hz, Temperature range from 25 to 100 $^\circ\text{C}$ . **(D)** Pictures of the free standing PEO<sub>6</sub>LiTFSI\*30% PVDF film: pristine film (left) and stretched (right). **(E)** PEO<sub>10</sub>LiTFSI film (PVDF-free) on laminated aluminum foil.

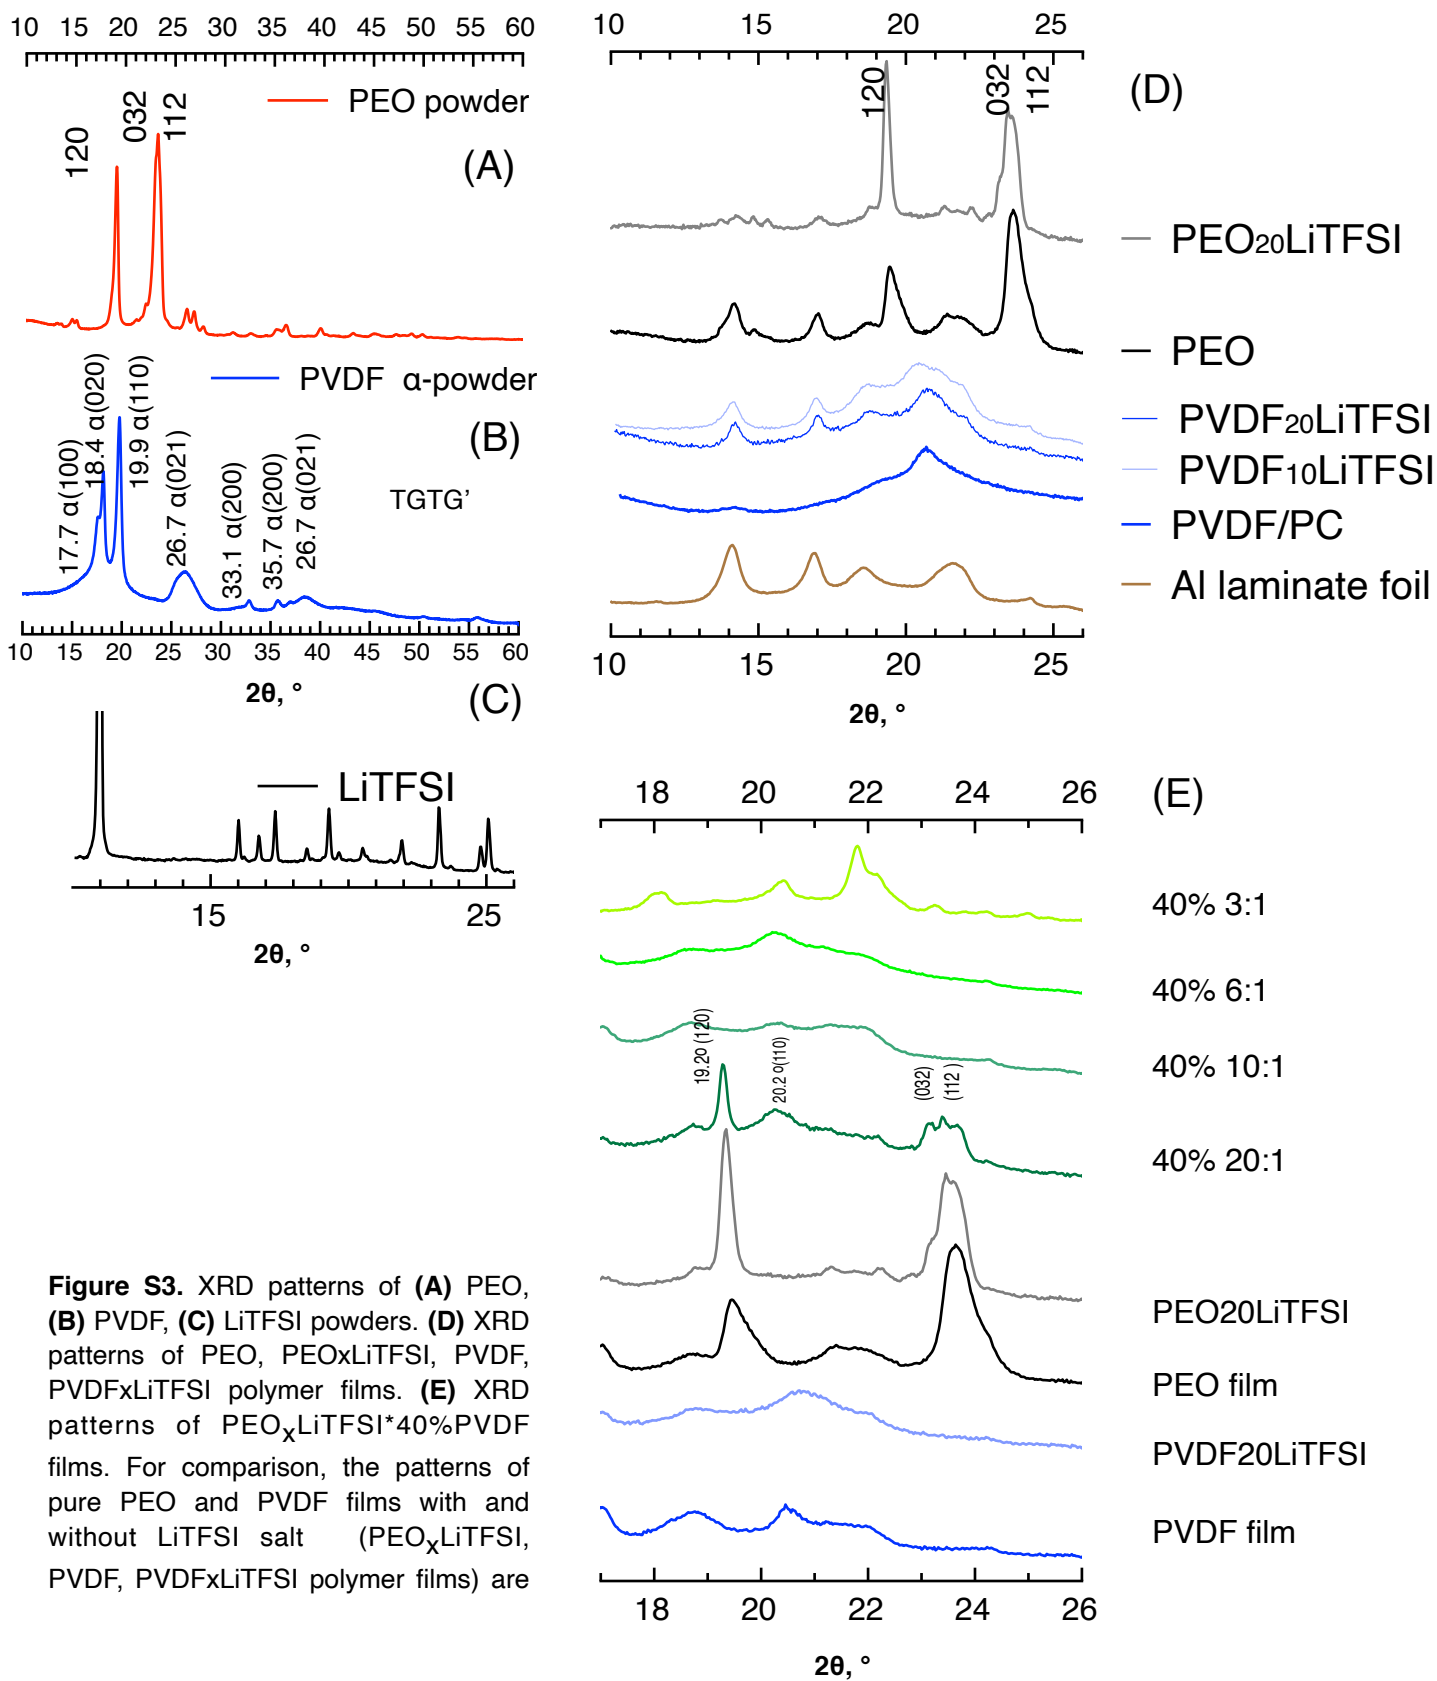

**Figure S3.** XRD patterns of **(A)** PEO, **(B)** PVDF, **(C)** LiTFSI powders. **(D)** XRD patterns of PEO, PEO<sub>x</sub>LiTFSI, PVDF, PVDF<sub>x</sub>LiTFSI polymer films. **(E)** XRD patterns of PEO<sub>x</sub>LiTFSI\*40%PVDF films. For comparison, the patterns of pure PEO and PVDF films with and without LiTFSI salt (PEO<sub>x</sub>LiTFSI, PVDF, PVDF<sub>x</sub>LiTFSI polymer films) are

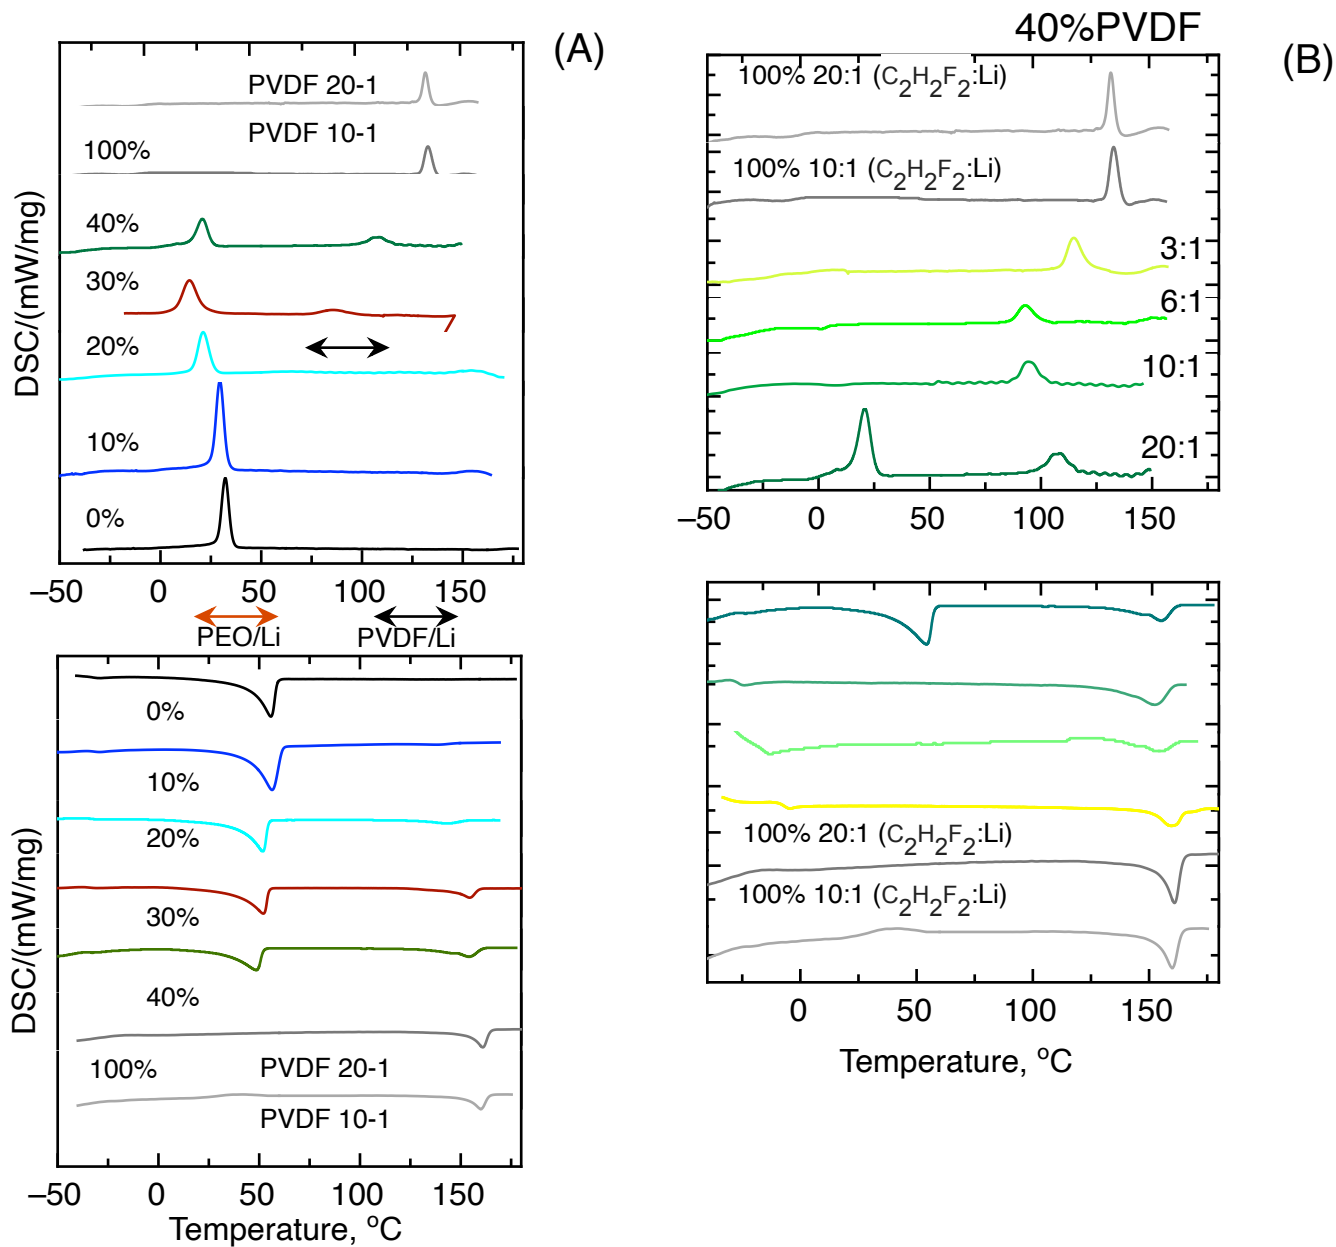

**Figure S4.** DSC thermograms for **(A)** PEOxLiTFSI\*m%PVDF and **(B)** PEOxLiTFSI\*40%PVDF polymer films on heating and cooling (10°C/min).



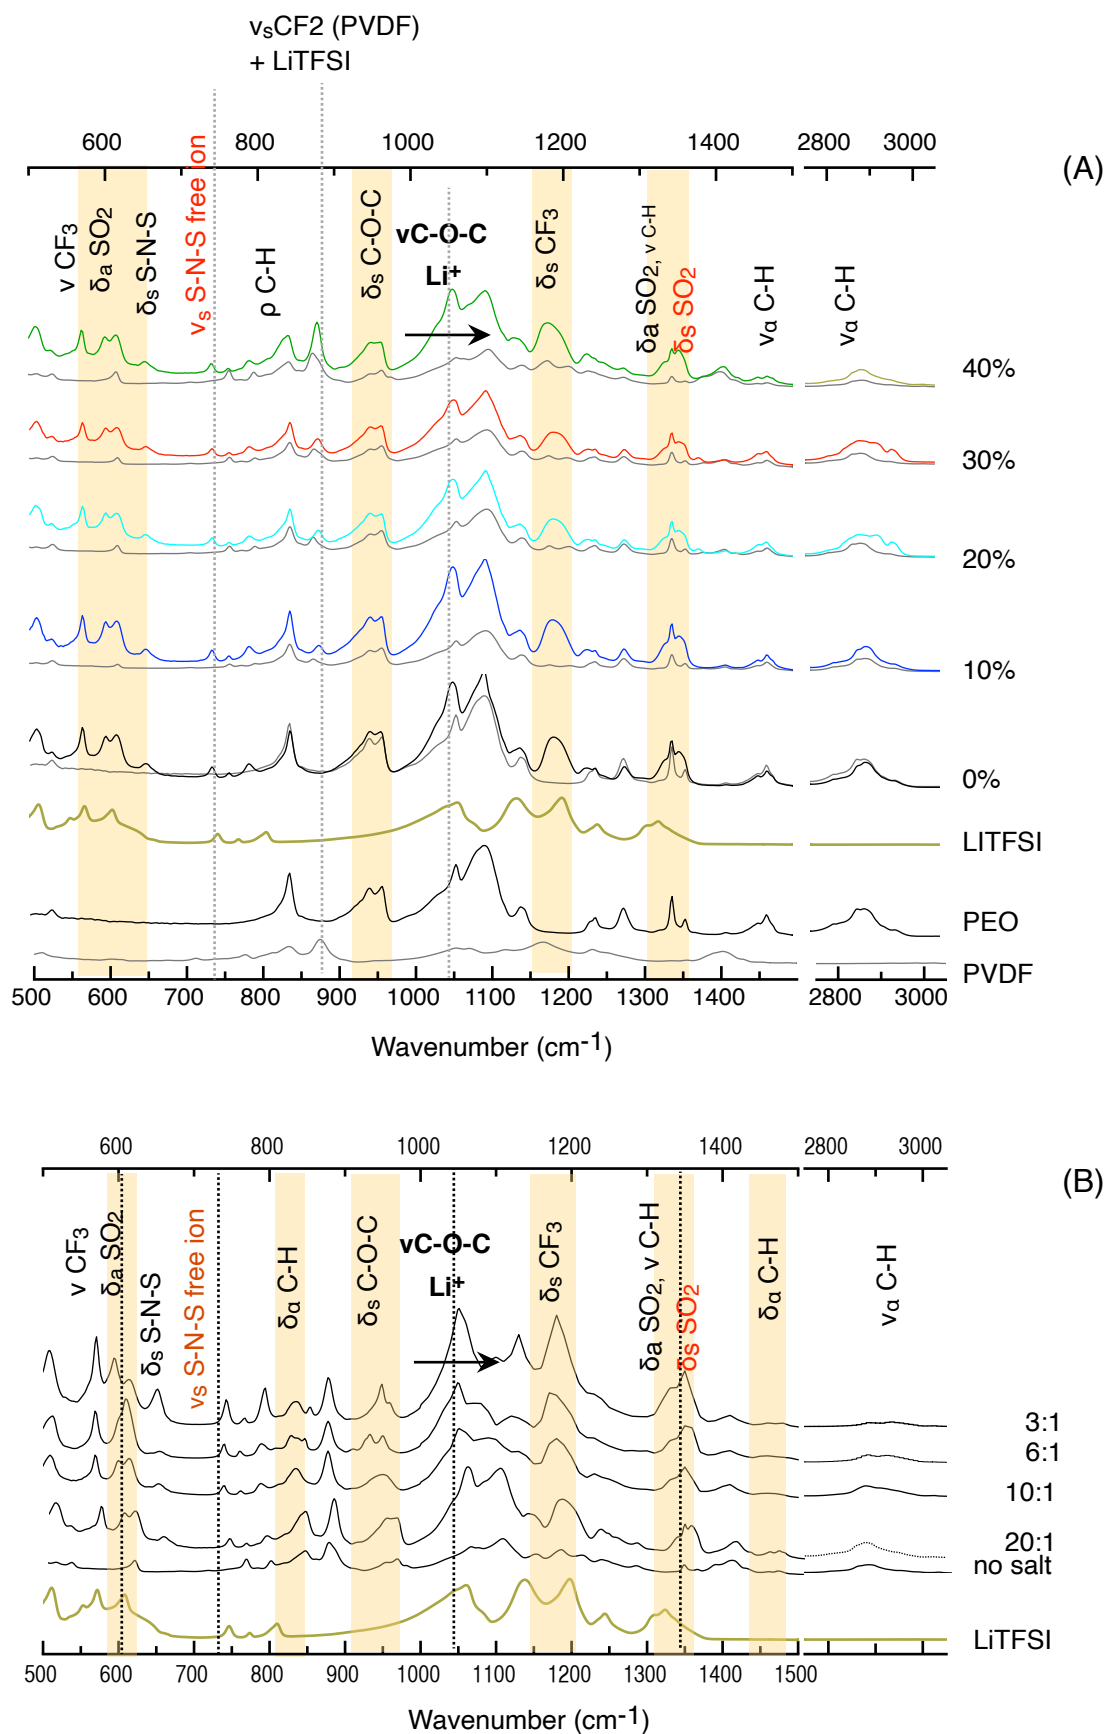

**Figure S5.** Fourier transform infrared spectroscopy (FTIR) spectra of **(A)**  $\text{PEO}_{20}\text{LiTFSI}^*m\%\text{PVDF}$  (grey lines denote the films of pure polymer  $\text{PEO}^*m\%\text{PVDF}$  blends of the corresponding composition, LiTFSI-free) and of **(B)**  $\text{PEO}_x\text{LiTFSI}^*40\%\text{PVDF}$  in the ranges 500-1500 and 2750-3050  $\text{cm}^{-1}$

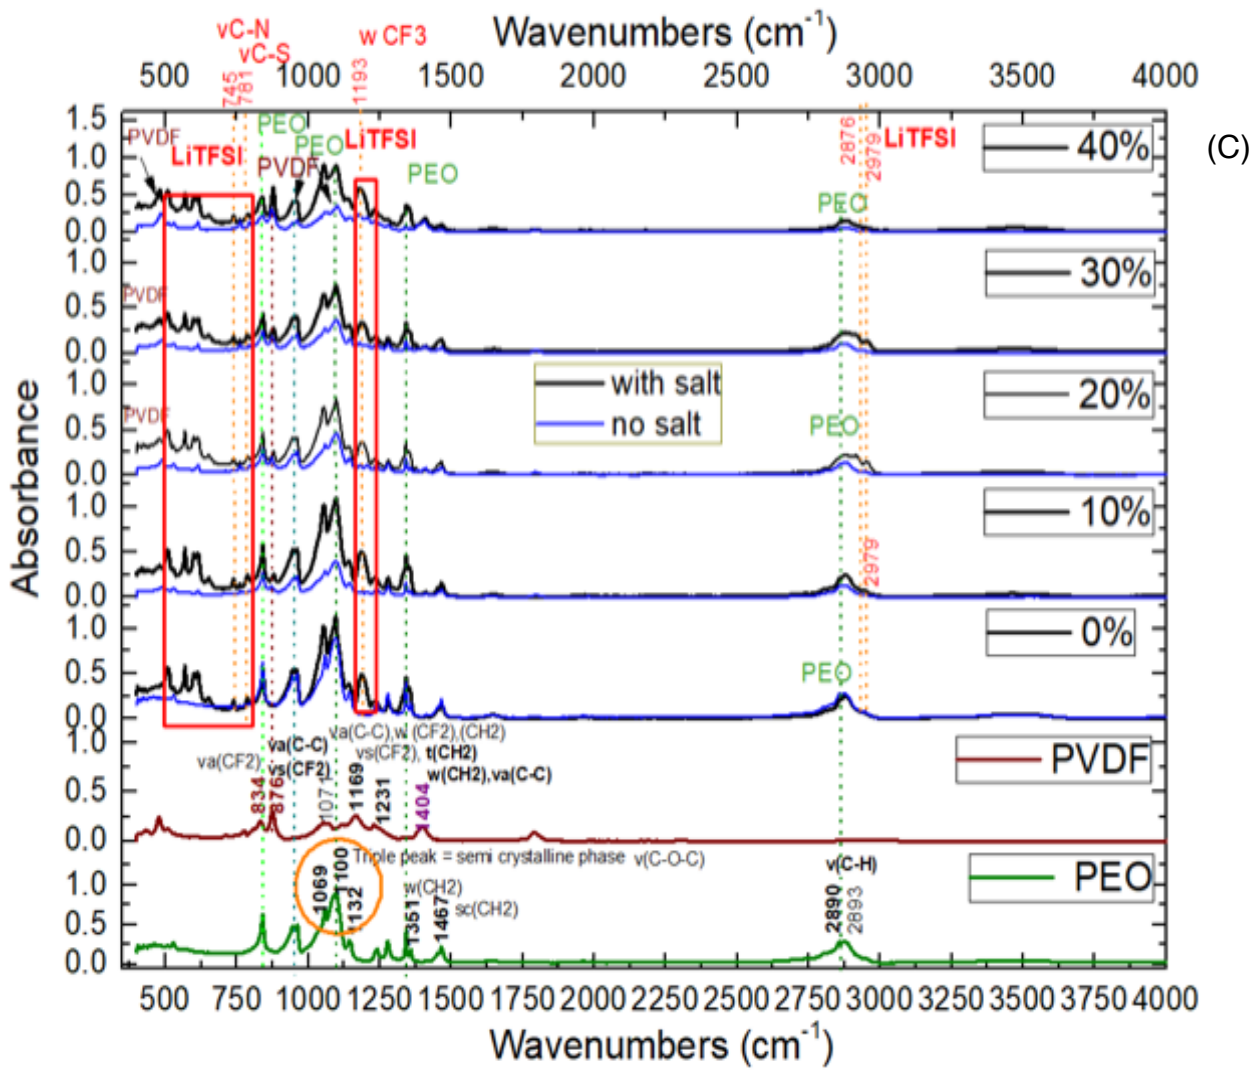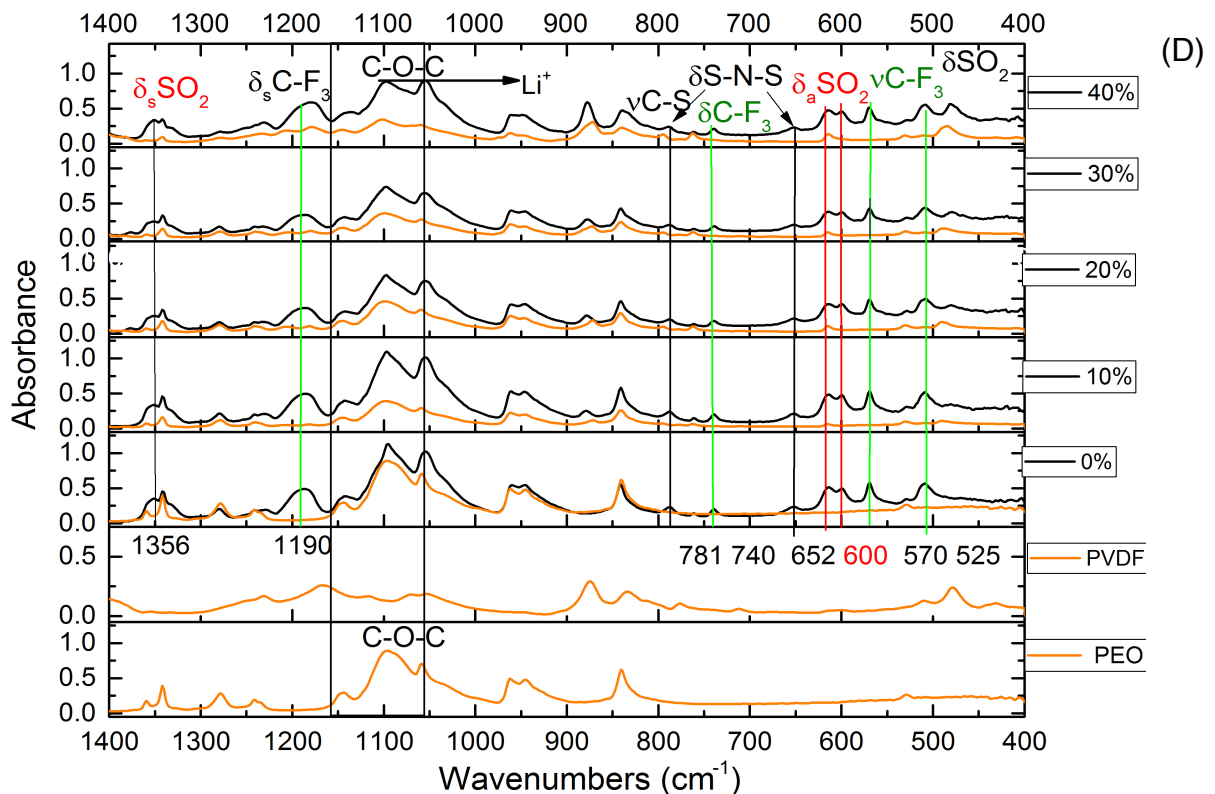

**Figure S5 (continued).** Vibrational fingerprints of PEO and PVDF (C) and LiTFSI (D) polymers shown on FTIR spectra of PEO<sub>20</sub>\*m%PVDF.



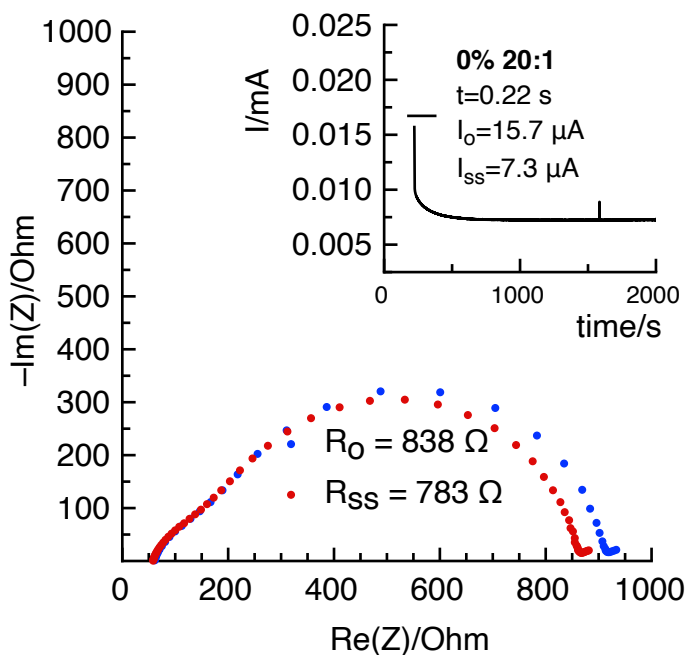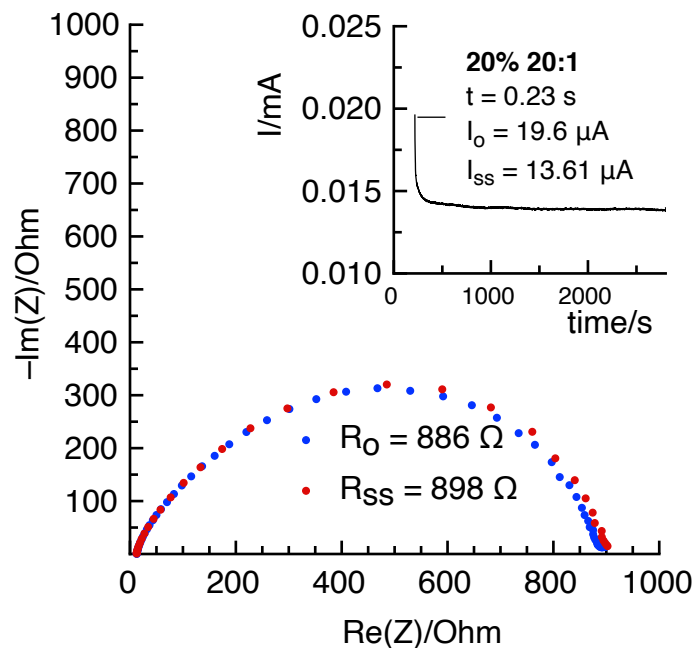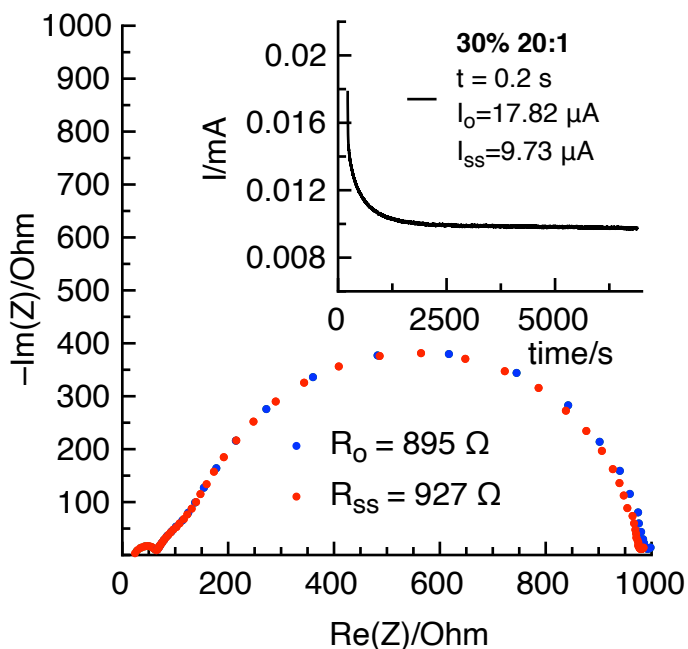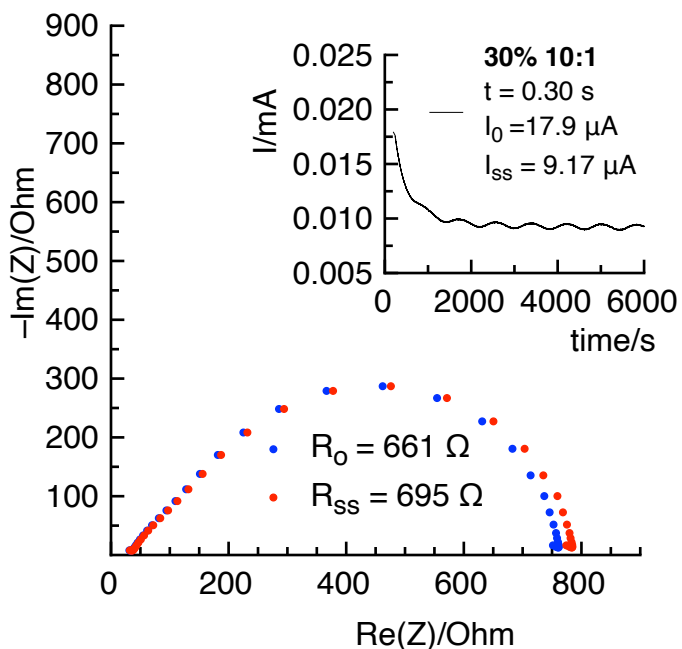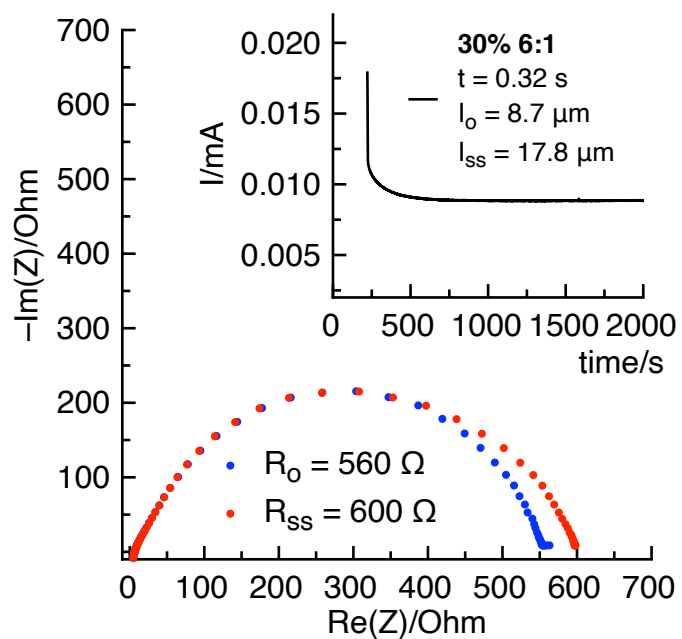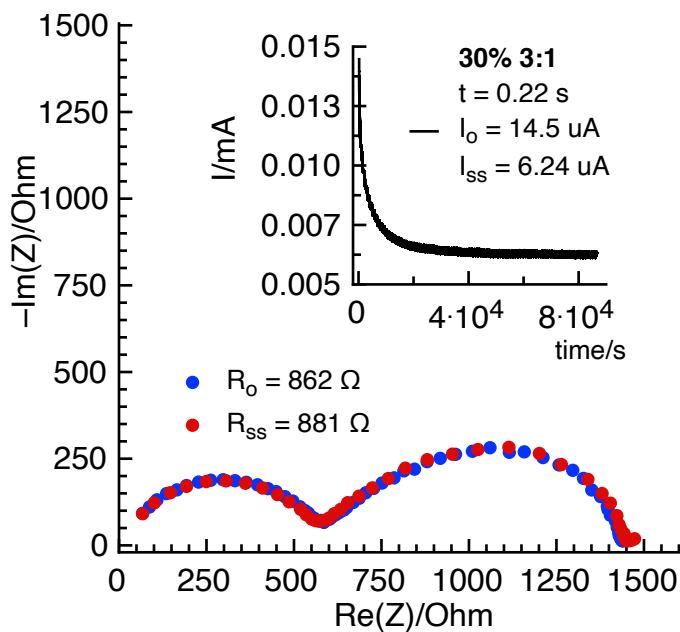

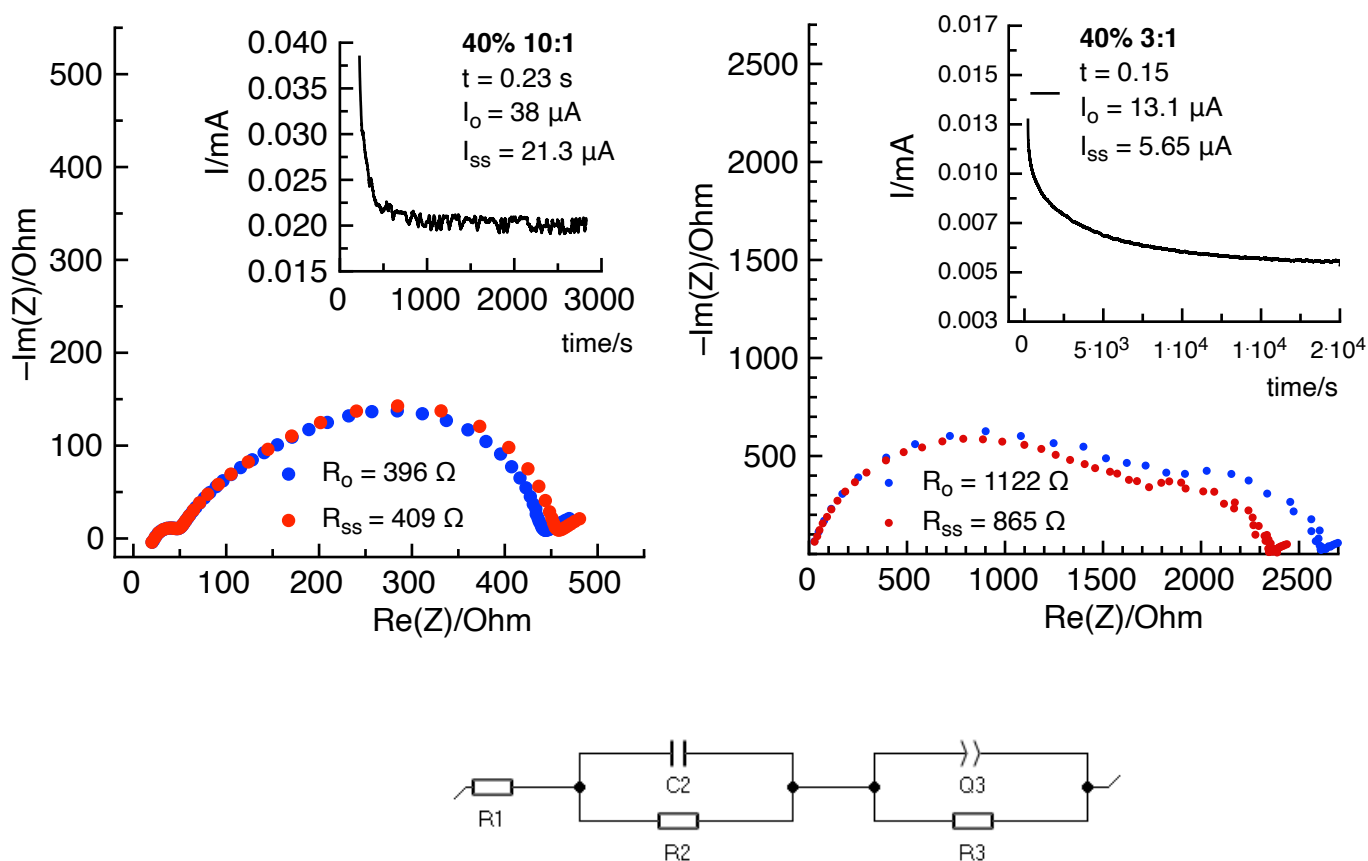

**Figure S6.** Li transference number determination for PEO<sub>x</sub>LiTFSI\*m%PVDF SPEs. Current transients at constant voltage polarization of 20 mV are shown in the insets, Nyquist plots before and after polarisation - in the main figures. The equivalent circuit for calculating the resistance in the experiment of determining Li<sup>+</sup> transfer numbers ( $t_{Li^+}$ ) is shown below the data. R1, R2 are the contact and bulk electrolyte resistance, respectively, R3 is the interphase resistance, C2 is a film capacity, Q is a constant phase element.

**Table S3.** The calculated values of Li<sup>+</sup> transference numbers for PEO<sub>x</sub>LiTFSI\*30%PVDF and PEO<sub>x</sub>LiTFSI\*40%PVDF compositions

| EO:Li ratio | 30%  | EO:Li ratio | 40%  |
|-------------|------|-------------|------|
| 20          | 0.2  | 20          | 0.16 |
| 10          | 0.3  | 10          | 0.23 |
| 8           | 0.3  | 6           | 0.26 |
| 6           | 0.32 | 3           | 0.15 |
| 3           | 0.22 |             |      |
